# Supplementary material
Source: MDPI journal article supplement (https://www.mdpi.com/2072-4292/13/10/1870)
Supplement: s1 [file s1]

## Supplementary Information

**Table S1.** Confusion matrix when all three sensors were used.

| Pixel-based                   |                  | Reference (known crop type) |         |         |       |         |          |
|-------------------------------|------------------|-----------------------------|---------|---------|-------|---------|----------|
|                               |                  | Maize                       | Mustard | Tobacco | Wheat | Row Tot | User Acc |
| Prediction/<br>Classification | Maize            | 1033                        | 50      | 152     | 179   | 1414    | 0.73     |
|                               | Mustard          | 12                          | 690     | 7       | 99    | 808     | 0.85     |
|                               | Tobacco          | 21                          | 128     | 1339    | 27    | 1515    | 0.88     |
|                               | Wheat            | 79                          | 131     | 62      | 2257  | 2529    | 0.89     |
|                               | Column Tot       | 1145                        | 999     | 1560    | 2562  | 6266    |          |
|                               | Prod Acc         | 0.90                        | 0.69    | 0.86    | 0.88  |         |          |
|                               | F1 score         | 0.81                        | 0.76    | 0.87    | 0.89  |         |          |
|                               | Overall Accuracy |                             |         |         |       |         | 0.85     |

**Table S2.** Confusion matrix across small fields using Sentinel-1, and Sentinel-2 data.

| Pixels from small fields      |                  | Reference (known crop type) |         |         |       |         |          |
|-------------------------------|------------------|-----------------------------|---------|---------|-------|---------|----------|
|                               |                  | Maize                       | Mustard | Tobacco | Wheat | Row Tot | User Acc |
| Prediction/<br>Classification | Maize            | 265                         | 24      | 0       | 54    | 343     | 0.77     |
|                               | Mustard          | 21                          | 112     | 0       | 50    | 183     | 0.61     |
|                               | Tobacco          | 16                          | 41      | 80      | 25    | 162     | 0.49     |
|                               | Wheat            | 54                          | 10      | 4       | 350   | 418     | 0.84     |
|                               | Column Tot       | 356                         | 187     | 84      | 479   | 1106    |          |
|                               | Prod Acc         | 0.74                        | 0.60    | 0.95    | 0.73  |         |          |
|                               | F1 score         | 0.76                        | 0.61    | 0.65    | 0.78  |         |          |
|                               | Overall Accuracy |                             |         |         |       |         | 0.73     |

**Table S3.** Confusion matrix across small fields using Planet, Sentinel-1, and Sentinel-2 data.

| Pixels from<br>small fields   |                  | Reference (known crop type) |         |         |       |         |          |
|-------------------------------|------------------|-----------------------------|---------|---------|-------|---------|----------|
|                               |                  | Maize                       | Mustard | Tobacco | Wheat | Row Tot | User Acc |
| Prediction/<br>Classification | Maize            | 309                         | 16      | 0       | 72    | 397     | 0.78     |
|                               | Mustard          | 11                          | 120     | 0       | 34    | 165     | 0.73     |
|                               | Tobacco          | 8                           | 43      | 80      | 11    | 142     | 0.56     |
|                               | Wheat            | 28                          | 8       | 4       | 362   | 402     | 0.90     |
|                               | Column Tot       | 356                         | 187     | 84      | 479   | 1106    |          |
|                               | Prod Acc         | 0.87                        | 0.64    | 0.95    | 0.76  |         |          |
|                               | F1 score         | 0.82                        | 0.68    | 0.71    | 0.82  |         |          |
|                               | Overall Accuracy |                             |         |         |       |         | 0.79     |

**Table S4.** Confusion matrix across large fields using Sentinel 1 and 2 data.

| Pixels from<br>large fields   |                  | Reference (known crop type) |         |         |       |         |          |
|-------------------------------|------------------|-----------------------------|---------|---------|-------|---------|----------|
|                               |                  | Maize                       | Mustard | Tobacco | Wheat | Row Tot | User Acc |
| Prediction/<br>Classification | Maize            | 649                         | 85      | 180     | 137   | 1051    | 0.62     |
|                               | Mustard          | 10                          | 497     | 6       | 84    | 597     | 0.83     |
|                               | Tobacco          | 75                          | 105     | 1221    | 22    | 1423    | 0.86     |
|                               | Wheat            | 55                          | 125     | 69      | 1840  | 2089    | 0.88     |
|                               | Column Tot       | 789                         | 812     | 1476    | 2083  | 5160    |          |
|                               | Prod Acc         | 0.82                        | 0.61    | 0.83    | 0.88  |         |          |
|                               | F1 score         | 0.71                        | 0.71    | 0.84    | 0.88  |         |          |
|                               | Overall Accuracy |                             |         |         |       |         | 0.82     |

**Table S5.** Confusion matrix across large fields using Planet, Sentinel-1, and Sentinel-2 data.

| Pixels from large fields      |                  | Reference (known crop type) |         |         |       |         |          |
|-------------------------------|------------------|-----------------------------|---------|---------|-------|---------|----------|
|                               |                  | Maize                       | Mustard | Tobacco | Wheat | Row Tot | User Acc |
| Prediction/<br>Classification | Maize            | 724                         | 34      | 152     | 107   | 1017    | 0.71     |
|                               | Mustard          | 1                           | 570     | 7       | 65    | 643     | 0.89     |
|                               | Tobacco          | 13                          | 85      | 1259    | 16    | 1373    | 0.92     |
|                               | Wheat            | 51                          | 123     | 58      | 1895  | 2127    | 0.89     |
|                               | Column Tot       | 789                         | 812     | 1476    | 2083  | 5160    |          |
|                               | Prod Acc         | 0.92                        | 0.70    | 0.85    | 0.91  |         |          |
|                               | F1 score         | 0.80                        | 0.78    | 0.88    | 0.90  |         |          |
|                               | Overall Accuracy |                             |         |         |       |         | 0.86     |

**Table S6.** Confusion matrix using early season imagery from all three sensors.

| Pixel-based                   |                  | Reference (known crop type) |         |         |       |         |          |
|-------------------------------|------------------|-----------------------------|---------|---------|-------|---------|----------|
|                               |                  | Maize                       | Mustard | Tobacco | Wheat | Row Tot | User Acc |
| Prediction/<br>Classification | Maize            | 254                         | 455     | 568     | 677   | 1954    | 0.13     |
|                               | Mustard          | 184                         | 119     | 139     | 582   | 1024    | 0.12     |
|                               | Tobacco          | 243                         | 212     | 714     | 316   | 1485    | 0.48     |
|                               | Wheat            | 464                         | 213     | 139     | 987   | 1803    | 0.55     |
|                               | Column Tot       | 1145                        | 999     | 1560    | 2562  | 6266    |          |
|                               | Prod Acc         | 0.22                        | 0.12    | 0.46    | 0.39  |         |          |
|                               | F1 score         | 0.16                        | 0.12    | 0.47    | 0.45  |         |          |
|                               | Overall Accuracy |                             |         |         |       |         | 0.33     |

**Table S7.** Confusion matrix using peak season imagery from all three sensors.

| Pixel-based                   |                  | Reference (known crop type) |         |         |       |         |          |
|-------------------------------|------------------|-----------------------------|---------|---------|-------|---------|----------|
|                               |                  | Maize                       | Mustard | Tobacco | Wheat | Row Tot | User Acc |
| Prediction/<br>Classification | Maize            | 670                         | 130     | 302     | 427   | 1529    | 0.44     |
|                               | Mustard          | 97                          | 626     | 32      | 354   | 1109    | 0.56     |
|                               | Tobacco          | 117                         | 58      | 1151    | 165   | 1491    | 0.77     |
|                               | Wheat            | 261                         | 185     | 75      | 1616  | 2137    | 0.76     |
|                               | Column Tot       | 1145                        | 999     | 1560    | 2562  | 6266    |          |
|                               | Prod Acc         | 0.59                        | 0.63    | 0.74    | 0.63  |         |          |
|                               | F1 score         | 0.50                        | 0.59    | 0.75    | 0.69  |         |          |
|                               | Overall Accuracy |                             |         |         |       |         | 0.65     |

**Table S8.** Confusion matrix using late season imagery from all three sensors.

| Pixel-based                   |                  | Reference (known crop type) |         |         |       |         |          |
|-------------------------------|------------------|-----------------------------|---------|---------|-------|---------|----------|
|                               |                  | Maize                       | Mustard | Tobacco | Wheat | Row Tot | User Acc |
| Prediction/<br>Classification | Maize            | 917                         | 94      | 244     | 164   | 1419    | 0.65     |
|                               | Mustard          | 53                          | 434     | 383     | 218   | 1088    | 0.40     |
|                               | Tobacco          | 108                         | 249     | 844     | 163   | 1364    | 0.62     |
|                               | Wheat            | 67                          | 222     | 89      | 2017  | 2395    | 0.84     |
|                               | Column Tot       | 1145                        | 999     | 1560    | 2562  | 6266    |          |
|                               | Prod Acc         | 0.80                        | 0.43    | 0.54    | 0.79  |         |          |
|                               | F1 score         | 0.72                        | 0.42    | 0.58    | 0.81  |         |          |
|                               | Overall Accuracy |                             |         |         |       |         | 0.67     |

**Table S9.** Confusion matrix using early and peak season imagery from all three sensors.

| Pixel-based                   |                  | Reference (known crop type) |         |         |       |         |          |
|-------------------------------|------------------|-----------------------------|---------|---------|-------|---------|----------|
|                               |                  | Maize                       | Mustard | Tobacco | Wheat | Row Tot | User Acc |
| Prediction/<br>Classification | Maize            | 520                         | 162     | 490     | 436   | 1608    | 0.32     |
|                               | Mustard          | 128                         | 588     | 25      | 404   | 1145    | 0.51     |
|                               | Tobacco          | 161                         | 71      | 965     | 159   | 1356    | 0.71     |
|                               | Wheat            | 336                         | 178     | 80      | 1563  | 2157    | 0.72     |
|                               | Column Tot       | 1145                        | 999     | 1560    | 2562  | 6266    |          |
|                               | Prod Acc         | 0.45                        | 0.59    | 0.62    | 0.61  |         |          |
|                               | F1 score         | 0.38                        | 0.55    | 0.66    | 0.66  |         |          |
|                               | Overall Accuracy |                             |         |         |       |         | 0.58     |

**Table S10.** Confusion matrix using peak and late season imagery from all three sensors.

| Pixel-based                   |                  | Reference (known crop type) |         |         |       |         |          |
|-------------------------------|------------------|-----------------------------|---------|---------|-------|---------|----------|
|                               |                  | Maize                       | Mustard | Tobacco | Wheat | Row Tot | User Acc |
| Prediction/<br>Classification | Maize            | 1010                        | 77      | 212     | 222   | 1521    | 0.66     |
|                               | Mustard          | 69                          | 717     | 73      | 293   | 1152    | 0.62     |
|                               | Tobacco          | 24                          | 42      | 1178    | 85    | 1329    | 0.89     |
|                               | Wheat            | 42                          | 163     | 97      | 1962  | 2264    | 0.87     |
|                               | Column Tot       | 1145                        | 999     | 1560    | 2562  | 6266    |          |
|                               | Prod Acc         | 0.88                        | 0.72    | 0.76    | 0.77  |         |          |
|                               | F1 score         | 0.76                        | 0.67    | 0.82    | 0.81  |         |          |
|                               | Overall Accuracy |                             |         |         |       |         | 0.78     |

**Table S11.** Confusion matrix using early, peak, and late season imagery from all three sensors.

| Pixel-based                |                  | Reference (known crop type) |         |         |       |         |          |
|----------------------------|------------------|-----------------------------|---------|---------|-------|---------|----------|
|                            |                  | Maize                       | Mustard | Tobacco | Wheat | Row Tot | User Acc |
| Prediction/ Classification | Maize            | 944                         | 87      | 207     | 229   | 1467    | 0.64     |
|                            | Mustard          | 49                          | 628     | 34      | 185   | 896     | 0.70     |
|                            | Tobacco          | 36                          | 78      | 1208    | 132   | 1454    | 0.83     |
|                            | Wheat            | 116                         | 206     | 111     | 2016  | 2449    | 0.82     |
|                            | Column Tot       | 1145                        | 999     | 1560    | 2562  | 6266    |          |
|                            | Prod Acc         | 0.82                        | 0.63    | 0.77    | 0.79  |         |          |
|                            | F1 score         | 0.72                        | 0.66    | 0.80    | 0.80  |         |          |
|                            | Overall Accuracy |                             |         |         |       |         | 0.77     |
